# Supplementary material
Source: publisher figshare collection journal article supplement (https://acs.figshare.com/ndownloader/files/14021474)
Supplement: Supplementary file 1 [file 14021474]

## Sheet: Sheet1
Table S4. Summary of Sensing Performances for Volatile Compounds by 2D Materials
		Analyte	Material	Architecture	LOD	Experimental range	Sensing environment	Ref
		2–butanone	M3HXTP2 (Cu3HHTP2, Cu3HITP2, Ni3HITP2)	chemiresistor: Au/M3HXTP2/Au	N/A	200 ppm	N2, r.t.	174
		acetaldehyde	MoS2–Au	chemiresistor: Au/ MoS2–Au/Au	N/A	1000 ppm	N2	774
		acetic acid	Gr–Au NPs or Pt NPs	chemiresistor: Au/G–AuNPs or Pt NPs/Au	50 ppm	50–200 ppm	AirD, r.t.	742
		acetone	Co3O4	chemiresistor: Ag–Pd /Co3O4/Ag–Pd	1.8 ppm	1–100 ppm	Air, 150 °C	799
		acetone	GO–Co3O4 NFs–Ir NPs	chemiresistor: Au/GO–Co3O4 NFs–Ir NPs/Al/Au	120 ppb	1–5 ppm	Air, 90 % RH, 300 °C	723
		acetone	Gr	FET: Si/ thermal oxide /Gr/Ti–Au/Ti–Au	N/A	N/A	Air, r.t.	740
		acetone	Gr–ZnFe2O4	chemiresistor	N/A	1–1000 ppm	180 °C	724
		acetone	M3HXTP2 (Cu3HHTP2, Cu3HITP2, Ni3HITP2)	chemiresistor: Au/M3HXTP2/Au	N/A	200 ppm	N2, r.t.	174
		acetone	MoS2	chemiresistor: Ti–Au/MoS2/Ti–Au	500 ppm	50–5000 ppm	N2, r.t.	166
		acetone	MoS2–mercaptoundecanoic acid	chemiresistor: Au–Cr/MoS2–mercaptoundecanoic acid/Au–Cr	<1 ppm	1–1000 ppm	N2, 25 °C	772
		acetone	MoS2–Au	chemiresistor: Au/ MoS2–Au/Au	N/A	1000 ppm	N2	774
		acetone	rGO	FET: Si/SiO2/rGO/Au/Au	N/A	200 ppm	Air, r.t.	725
		acetone	rGO–SnO2	chemiresistor: Au/rGO–SnO2/Au	100 ppb	1–5 ppm	Air, 85−95% RH, 350 °C	560
		acetone	SnO2–Eu	chemiresistor: Au–Ti/SnO2–Eu/Au–Ti	131 ppb	5–100 ppm	30 to 70 RH%, 210 °C	815
		acetone	Ti3C2Tx	chemiresistor:Pt/Ti3C2Tx /Pt	9.27 ppm	25–200 ppm	Air, r.t.	203
		acetone	Ti3C2Tx	chemiresistor: Au/Ti3C2Tx /Au	0.011 ppb	50–1000 ppb	N2, 25 °C	625
		acetone	WS2–Ag	chemiresistor: Cr–Au/WS2–Ag/Cr–Au	25 ppm	0.5–10 ppm	Aird, 100 °C	589
		acetonitrile	MoS2	FET: Si/SiO2/MoS2/Au/Au	N/A	N/A	N/A	771
		benzene	Gr–ODA	chemiresistor: Au/Gr–ODA/Au	10 ppm	5–100 ppm	1 vol.% ethanol	726
		benzene	M3HXTP2 (Cu3HHTP2, Cu3HITP2, Ni3HITP2)	chemiresistor: Au/M3HXTP2/Au	N/A	200 ppm	N2, r.t.	174
		chlorobenzene	Gr	FET: Si/thermal oxide/Gr/Ti–Au/Ti–Au	N/A	N/A	Air, r.t.	740
		chlorobenzene	ZnO	chemiresistor: Pt/ZnO/Pt	N/A	100–250 ppm	Air, 200 °C	777
		chloroform	GO–PPr	chemiresistor: Pt/GO–PPr/Pt	400 ppm	400–1000 ppm	N2, r.t.	816
		chloroform	Gr	PN diode: Au–Cr/Gr–Si/Au–Cr	N/A	N/A	r.t.	737
		chloroform	MoS2	FET: Si/SiO2/MoS2/Au/Au	N/A	N/A	N/A	771
		chloroform,	Gr	FET: Si/thermal oxide/Gr/Ti–Au/Ti–Au	N/A	N/A	Air, r.t.	740
		cyclohexane	Gr–ODA	chemiresistor: Au/Gr–ODA/Au	5 ppm	5–100 ppm	1 vol.% ethanol	726
		dichloromethane	Gr	FET: Si/thermal oxide/Gr/Ti–Au/Ti–Au	N/A	N/A	Air, r.t.	740
		DMA	GO	chemiresistor: Ti–Au/Gr/Ti–Au	N/A	N/A	N/A	733
		DNT	rGO	chemiresistor: Ti–Au/rGO/Ti–Au	0.1 ppb	N/A	N2	702
		DMMP	Gr	chemiresistor: Ag/Gr/Ag	N/A	5–15 ppm	N/A	731
		DMMP	Gr	FET: Si/SiO2/Gr/Au/Au	N/A	N/A	N/A	692
		DMMP	Gr	FET: Si/thermal oxide/Gr/Ti–Au/Ti–Au	0.64 ppb	N/A	Air, r.t.	740
		DMMP	rGO	chemiresistor: Pt/rGO/Pt	N/A	10–60 ppm	N2, 25 °C	729
		DMMP	rGO	chemiresistor: Cr–Au/rGO/Cr–Au	N/A	5–80 ppm	AirD, 25 °C	730
		DMMP	rGO	chemiresistor: Ti–Au/rGO/Ti–Au	5 ppb	N/A	N2	702
		ethanol	Co3O4	chemiresistor: Pt/Co3O4/Pt	N/A	5–500 ppm	Air, 180 °C	793
		ethanol	CuO	chemiresistor: Au/CuO/Au	N/A	10–1000 ppm	Air, 260 °C	800
		ethanol	Gr–AuNPs or Pt NPs	chemiresistor: Au/G–Au NPs or Pt NPs/Au	50 ppm	50–200 ppm	AirD, r.t.	742
		ethanol	GO–OA–F8T2	FET: Si/SiO2/GO–OA–F8T2/Au/Au	N/A	N/A	r.t.	714
		ethanol	GO–phenyl	capacitor: Au/GO–phenyl/Au	N/A	70–1000 ppm	r.t.	739
		ethanol	Gr	FET: Si/SiO2/Gr/Pt/Pt	N/A	N/A	N/A	713
		ethanol	Gr–Fe2O3	chemiresistor: Pt/Gr–Fe2O3/Pt	N/A	1–1000 ppm	280 °C	715
		ethanol	M3HXTP2 (Cu3HHTP2, Cu3HITP2, Ni3HITP2)	chemiresistor: Au/M3HXTP2/Au	N/A	200 ppm	N2, r.t.	174
		ethanol	MoO3	chemiresistor: Ag–Pd/MoO3/ Ag–Pd	N/A	10–500 ppm	Air, 300 °C	795
		ethanol	MoS2	FET: Si–SiO2/Oxide/MoS2/Au/Au	N/A	N/A	N/A	771
		ethanol	MoS2	chemiresistor: Cr−Au/MoS2−Si/Cr−Au	1 ppm	5–40 ppm	r.t.	769
		ethanol	MoS2	FET: Si/SiO2/ MoS2/metal/matal	N/A	N/A	r.t.	770
		ethanol	MoS2–mercaptoundecanoic acid	chemiresistor: Au–Cr/MoS2–mercaptoundecanoic acid/Au–Cr	<10 ppm	1–1000 ppm	N2, 25 °C	772
		ethanol	MoS2–SnO2	chemiresistor: Au/ MoS2–SnO2/Au	N/A	50–1000 ppm	Air, 280 °C	767
		ethanol	NiO	chemiresistor	N/A	5–500 ppm	Air, 200 °C	790
		ethanol	NiO	chemiresistor: Au/NiO/Au	N/A	100–700 ppm	Air, 300 °C	791
		ethanol	rGO	FET: Si/SiO2/rGO/Ti–Pt/Ti–Pt	N/A	N/A	N/A	713
		ethanol	SnO2	chemiresistor: Au/SnO2/Au	N/A	1.5–50 ppm	Air, 350 °C	781
		ethanol	SnO2	chemiresistor: Au/SnO2/Au	N/A	20–90 ppm	Air, 250 °C	782
		ethanol	SnO2	chemiresistor: Au/SnO2/Au	N/A	1–1000 ppm	Air, 165 °C	783
		ethanol	SnO2	chemiresistor: Au/SnO2/Au	N/A	100 ppm	Air, 300 °C	784
		ethanol	SnO2	chemiresistor: Au/SnO2/Au	N/A	5–200 ppm	Air, 300 °C	786
		ethanol	SnO2	chemiresistor	N/A	10–100 ppm	Air, 250 °C	787
		ethanol	SnO2	chemiresistor: Au/SnO2/Au	1.37 ppm	50–300 ppm	Air, 250 °C	788
		ethanol	SnO2	chemiresistor: Au/SnO2/Au	<5 ppm	5–500 ppm	N/A	789
		ethanol	SnS2	chemiresistor: Cu/SnS2/Cu	N/A	N/A	r.t.	393
		ethanol	Ti3C2Tx	chemiresistor:Pt/Ti3C2Tx/Pt	N/A	100 ppm	Air, r.t.	203
		ethanol	Ti3C2Tx	chemiresistor: Au/Ti3C2Tx/Au	<1 ppb	100–100 ppb	N2, 25 °C	625
		ethanol	TiO2	chemiresistor: Ag–Pd/TiO2/Ag–Pd	N/A	200–6000 ppm	Air, r.t./310 °C	796
		ethanol	WO3	chemiresistor: Pt/WO3/Pt	N/A	10–300 ppm	air, 300 °C	794
		ethanol	WS2	FET: Si/SiO2/ WS2/Au/Au	N/A	N/A	r.t.	768
		ethanol	ZnO	chemiresistor: Pt/ZnO/Pt	N/A	100–250 ppm	Air, 380 °C	777
		ethanol	ZnO	chemiresistor	10 ppb	0.01–1000 ppm	Air, 400 °C	779
		ethanol	ZnO–Au	chemiresistor: Pt/ZnO–Au/Pt	N/A	50–800 ppm	Air, 300 °C	778
		ethyl acetate	CuO	chemiresistor: Au/CuO/Au	N/A	10–1000 ppm	Air, 260 °C	800
		ethylbenzene	Gr–ODA	chemiresistor: Au/Gr–ODA/Au	3 ppm	5–100 ppm	1 vol.% ethanol	726
		ethylene glycol	SnO2	chemiresistor: Au/SnO2/Au	1.3758ppm	5–1000 ppm	AirD, 220 °C	801
		formaldehyde	Gr-PMMA	chemiresistor: Pt/Gr–PMMA/Pt	10 ppb	0.05–5.0 ppm	N2, r.t.	718
		formaldehyde	NiO	chemiresistor: Au/ NiO/Au	100 ppb	1–1000 ppm	Air, 240 °C	798
		formaldehyde	rGO–ZnO	Diode: Au–Ti/ rGO–ZnO/Au–Ti	0.875 ppm	120 ppb to 1 ppm	AirD, r.t.	719
		formaldehyde	ZnO	chemiresistor: Au/ ZnO/Au	N/A	50–500 ppm	AirD, 250 °C	604
		formaldehyde	ZnO	chemiresistor: Au/ ZnO/Au	N/A	50 ppm	Air, 350 °C	797
		H2O	BP	FET: Si/SiO2/BP/Au/Au	21% RH	21–83% RH	Ar	752
		H2O	BP	chemiresistor: Au/BP/Au	N/A	10%–85% RH	Air, 25 °C	749
		H2O	BP	FET: Si/ SiO2 /Gr–DNA/Ti–Au/Ti–Au	N/A	11%–97%	25 °C	750
		H2O	BP	FET: glass/ITO/ BP/Ti–Au/Ti–Au	N/A	11%–97%	r.t.	751
		H2O	BP QDs	chemiresistor: Al/BP/Al	N/A	15%–90% RH	Air, 21 °C	817
		H2O	GO	chemiresistor: Ag/GO/Ag	30% RH	30–80% RH	Air, 10–40 °C	678
		H2O	GO	capacitor: electrode/GO/electrode	N/A	15%–95% RH	25 °C	679
		H2O	GO	chemiresistor: Au/GO/Au	N/A	30%–90% RH	Air, 25 °C	685
		H2O	GO	chemiresistor: Au/GO/Au	N/A	11%–95%RH	r.t.	687
		H2O	GO–PSS	capacitor: Ag/GO–PSS/Ag	N/A	0%−80%RH	Air	698
		H2O	GO–EA or HA	chemiresistor: Au/GO–EA/Au	N/A	20%–90%	Air, r.t.	700
		H2O	GO–phenyl	capacitor: Au/GO–phenyl/Au	<6%	6%–97% RH	r.t.	739
		H2O	Gr	capacitor: Gr/Analyte/Gr	N/A	0–25 w/w% in ethanol	ethanol	689
		H2O	Gr	varactor: Si/SiO2/Gr/Ti–Pd–Au/Ti–Pd–Au	N/A	1%–97% RH	Air, 23 °C	691
		H2O	Gr	varactor: Si/SiO2/Gr/metal/metal	N/A	20%–90%RH	Air, r.t.	695
		H2O	Gr	FET: Si/SiO2/Gr/metal/metal	N/A	5%–90% RH	r.t.	696
		H2O	Gr	chemiresistor: Ti–Au/Gr/Ti–Au	N/A	1%–96%RH	Air, r.t.	697
		H2O	Gr–PEI	FET: Si/SiO2/Gr–PEI/Au–Ti/Au–Ti	N/A	10%–60%RH	r.t.	364
		H2O	GO–Au NPs–MPTMOS	chemiresistor: Au/ GO–AuNPs–MPTMOS/Au	N/A	20%–90% RH	Air, r.t.	818
		H2O	Gr–PPy	chemiresistor: Au/Gr–PPy/Au	N/A	12%–90% RH	Air, r.t.	699
		H2O	MoS2	chemiresistor: Pt/ MoS2/Pt	N/A	0%–60%RH	N/A	757
		H2O	rGO–PEDOT	chemiresistor	N/A	0%–98% RH	Air, r.t.	690
		H2O	rGO–PDDA	chemiresistor: Cu–Ni/rGO–PDDA/Cu–Ni	N/A	11%–97%RH	Air, r.t.,	686
		H2O	SnS2	chemiresistor: Cu/SnS2/Cu	N/A	11–97% RH	r.t.	393
		H2O	VS2	chemiresistor: Au/ VS2/Au	N/A	0%–100% RH	25 °C	756
		H2O	WS2	FET: Si/SiO2/ WS2/Ag/Ag	N/A	11.3%–97%RH	r.t.	759
		H2O	WS2	chemiresistor: Gr/WS2/Gr	N/A	0%–90%RH	N2, r.t.	760
		HCN	Gr QDs	chemiresistor: Pt/Gr QDs/Pt	0.6 ppm	1–100 ppm	Air, 25 °C	705
		HCN	rGO	chemiresistor: Ti–Au/rGO/Ti–Au	70 ppb	N/A	N2	702
		hexane	GO–PPr	chemiresistor: Pt/GO–PPr/Pt	<200 ppm	200–900 ppm	N2, RT	816
		hexanoic acid	Gr–DNA	FET: Si/ SiO2/Gr–DNA/Au–Ti–Pd /Au–Ti–Pd	N/A	3–63 ppm	Air, 33% RH	741
		Hg	MoS2–PANI	chemiresistor: Pt/MoS2–PANI/Pt	N/A	0.55–452.51 mg m–3	r.t.	763
		humidity	MoS2	FET: Si/SiO2/MoS2/Ti–Au/Ti–Au	N/A	4%–84%RH	N2, r.t.	101
		isopropanol	M3HXTP2 (Cu3HHTP2, Cu3HITP2, Ni3HITP2)	chemiresistor: Au/M3HXTP2/Au	N/A	200 ppm	N2, r.t.	174
		isopropyl alcohol	SnS2	chemiresistor: Cu/SnS2/Cu	N/A	N/A	r.t.	393
		liquid petroleum gas	Gr	chemiresistor: Ag/Gr/Ag	4 ppm	N/A	Air, r.t.	544
		melamine	Gr	FET: Si/SiO2/rGO/Au/Au	N/A	N/A	175 °C	230
		methanol	BP	chemiresistor: Au/BP/Au	28 ppm	380–1900 ppm	r.t.	755
		methanol	GO–PEDOT–PSS	chemiresistor: Au/GO–PEDOT–PSS/Au	N/A	35–1000 ppm	r.t.	738
		methanol	Gr	FET: Si/SiO2/Gr/Cr–Au/Cr–Au	N/A	N/A	r.t.	716
		methanol	Gr	PN diode: Au–Cr/Gr–Si/Au–Cr	N/A	N/A	r.t.	737
		methanol	M3HXTP2 (Cu3HHTP2, Cu3HITP2, Ni3HITP2)	chemiresistor: Au/M3HXTP2/Au	N/A	200 ppm	N2, r.t.	174
		methanol	MoS2	FET: Si/SiO2/MoS2/Au/Au	N/A	N/A	N/A	771
		methanol	SnS2	chemiresistor: Cu/SnS2/Cu	N/A	N/A	r.t.	393
		methanol	Ti3C2Tx	chemiresistor: Pt Ti3C2Tx /Pt	N/A	100 ppm	Air, r.t.	203
		m–xylene	Gr–ODA	chemiresistor: Au/ Gr–ODA/Au	3 ppm	5–100 ppm	1 vol.% ethanol	726
		DMF	Gr	FET: Si/thermal oxide/Gr/Ti–Au/Ti–Au	N/A	N/A	Air, r.t.	740
		n–butylamine	M3HXTP2 (Cu3HHTP2, Cu3HITP2, Ni3HITP2)	chemiresistor: Au/M3HXTP2/Au	N/A	200 ppm	N2, r.t.	174
		n–hexane	MoS2–mercaptoundecanoic acid	chemiresistor: Au–Cr/MoS2–mercaptoundecanoic acid/Au–Cr	<1 ppm	1–1000 ppm	N2, 25 °C	772
		nitroaniline	SnS2	LSV: SnS2/GCE	15×10−6 mol/L	15.6×10−6–0.5×10−3 mol/L	N/A	776
		NMP	GO	chemiresistor: Ti–Au/Gr/Ti–Au	N/A	N/A	N/A	733
		octanoic aicd	Gr–DNA	FET: Si/SiO2/Gr–DNA/Au–Ti–Pd/Au–Ti–Pd	1 ppm	N/A	Air, 33% RH	741
		o–xylene	Gr–ODA	chemiresistor: Au/Gr–ODA/Au	3 ppm	5–100 ppm	1 vol.% ethanol	726
		phenol	GO–phenyl	capacitor: Au/GO–phenyl/Au	N/A	70–1000 ppm	r.t.	739
		phenol	Gr	PN diode: Au–Cr/Gr–Si/Au–Cr	N/A	1 mM–1 M	r.t.	737
		propanal	MoS2–mercaptoundecanoic acid	chemiresistor: Au–Cr/MoS2–mercaptoundecanoic acid/Au–Cr	1 ppm	1–1000 ppm	N2, 25 °C	772
		propanal	Ti3C2Tx	chemiresistor: Au/Ti3C2Tx/Au	<1 ppb	N/A	N2, 25 °C	625
		propionic acid	Gr–DNA	FET: Si/ SiO2/Gr–DNA/Au–Ti–Pd/Au–Ti–Pd	N/A	50–1000 ppm	Air, 33%RH	741
		p–xylene	Gr–ODA	chemiresistor: Au/ Gr–ODA/Au	3 ppm	5–100 ppm	1 vol.% ethanol	726
		p–xylene	M3HXTP2 (Cu3HHTP2, Cu3HITP2, Ni3HITP2)	chemiresistor: Au/M3HXTP2/Au	N/A	200 ppm	N2, r.t.	174
		tetrahydrofuran	M3HXTP2 (Cu3HHTP2, Cu3HITP2, Ni3HITP2)	chemiresistor: Au/M3HXTP2/Au	N/A	200 ppm	N2, r.t.	174
		tetrahydrofuran	M3HXTP2 (Cu3HHTP2, Cu3HITP2, Ni3HITP2)	chemiresistor: Au/M3HXTP2/Au	N/A	200 ppm	N2, r.t.	174
		toluene	GO–PPr	chemiresistor: Pt/GO–PPr/Pt	24 ppm	24–500 ppm	N2, r.t.	816
		toluene	Gr–ODA	chemiresistor: Au/Gr–ODA/Au	5 ppm	5–100 ppm	1 vol.% ethanol	726
		toluene	M3HXTP2 (Cu3HHTP2, Cu3HITP2, Ni3HITP2)	chemiresistor: Au/M3HXTP2/Au	N/A	200 ppm	N2, r.t.	174
		toluene	MoS2	FET: Si–SiO2/Oxide/MoS2/Au/Au	N/A	N/A	N/A	771
		toluene	MoS2–mercaptoundecanoic acid	chemiresistor: Au–Cr/MoS2–mercaptoundecanoic acid/Au–Cr	<10 ppm	1–1000 ppm	N2, 25 °C	772
		triazine	Gr	FET: Si/SiO2/rGO/Ti–Au/Ti–Au	N/A	N/A	140 °C	230
		triethylamine	MoS2	chemiresistor: Ti–Au/MoS2/Ti–Au	10 ppb	50–5000 ppm	N2, r.t.	166
		triethylamine	MoS2	chemiresistor: Ti–Au/MoS2/Ti–Au	10 ppb	1–100 ppm	N2, r.t.	166
		trimethylamine	MoS2	FET: Si/SiO2/ MoS2/Ag/Ag	N/A	N/A	r.t.	764
		trimethylamine	rGO–nylon–6	chemiresistor: Au/rGO–nylon–6/Au	0.39 mg/L	23–230 mg/L	50% RH, r.t.	745
